# Supplementary material for: Does Shoot Age Influence Biological and Chemical Properties in Black Currant (Ribes nigrum L.) Cultivars?
Source: MDPI journal article supplement (doi:10.3390/plants11070866), 2022-03-24
Supplement: s1 [file s1]

# Does shoot age influence biological and chemical properties in black currant (*Ribes nigrum* L.) cultivars?

Boban Djordjevic<sup>1\*</sup>, Dejan Djurovic<sup>1</sup>, Gordan Zec<sup>1</sup>, Dragana Dabić Zagorac<sup>2</sup>, Maja Natić<sup>3</sup>, Mekjell Meland<sup>4</sup>, Milica Fotirić Akšić<sup>1</sup>

<sup>1</sup>Faculty of Agriculture, University of Belgrade, Nemanjina 6, 11080 Belgrade, Serbia

<sup>2</sup>Innovation Centre, Faculty of Chemistry Ltd., Studentski trg 12-16, 11000 Belgrade, Serbia

<sup>3</sup>Faculty of Chemistry, University of Belgrade, P.O. Box 51, 11158 Belgrade, Serbia

<sup>4</sup>Norwegian Institute of Bioeconomy Research (NIBIO), Ullensvangvegen1005, N-5781 Lofthus, Norway

\* Corresponding author: b.djordjevic@agrif.bg.ac.rs

Content: **Table S1.** Average data (2018/2109) for 13 studied black current cultivars studied

Table S1. Average data (2018/2109) of all analyzed traits in 13 black current cultivars studied.

| N<br>o | Variables                             | Samples   |         |           |         |         |         |            |         |         |         |         |         |       |      |         |      |             |         |         |         |         |         |         |         |               |         |
|--------|---------------------------------------|-----------|---------|-----------|---------|---------|---------|------------|---------|---------|---------|---------|---------|-------|------|---------|------|-------------|---------|---------|---------|---------|---------|---------|---------|---------------|---------|
|        |                                       | Ben sarek |         | Ben nevis |         | Bona    |         | Ben lomond |         | Ometa   |         | Tenah   |         | Silmu |      | Titania |      | Moling juel |         | Ojebin  |         | Tsema   |         | Triton  |         | Čačanska crna |         |
|        |                                       | 3         | 2       | 3         | 2       | 3       | 2       | 3          | 2       | 3       | 2       | 3       | 2       | 3     | 2    | 3       | 2    | 3           | 2       | 3       | 2       | 3       | 2       | 3       | 2       | 3             | 2       |
|        |                                       | year      | year    | year      | year    | year    | year    | year       | year    | year    | year    | year    | year    | year  | year | year    | year | year        | year    | year    | year    | year    | year    | year    | year    | year          | year    |
|        |                                       | BS<br>3#  | BS<br>2 | BN<br>3   | BN<br>2 | BO<br>3 | BO<br>2 | BL<br>3    | BL<br>2 | O<br>M3 | O<br>M2 | TE<br>3 | TE<br>2 | SI3   | SI2  | TI3     | TI2  | MJ<br>3     | MJ<br>2 | OJ<br>3 | OJ<br>2 | TS<br>3 | TS<br>2 | TR<br>3 | TR<br>2 | CC<br>3       | CC<br>2 |
| 1      | Bud burst<br>Beginning of<br>blooming | 59.       | 62.     | 61.       | 63.     | 56.     | 58.     | 61.        | 65.     | 60.     | 64.     | 61.     | 63.     | 60.   | 64.  | 67.     | 73.  | 59.         | 63.     | 60.     | 63.     | 60.     | 65.     | 59.     | 62.     | 60.           | 63.     |
| †      |                                       | 50        | 50      | 00        | 00      | 50      | 50      | 50         | 50      | 50      | 00      | 00      | 50      | 50    | 00   | 50      | 50   | 00          | 50      | 00      | 00      | 00      | 50      | 00      | 00      | 00            |         |
| 2      |                                       | 84.       | 88.     | 84.       | 88.     | 81.     | 84.     | 82.        | 87.     | 83.     | 86.     | 84.     | 86.     | 84.   | 87.  | 84.     | 87.  | 83.         | 84.     | 83.     | 85.     | 81.     | 86.     | 83.     | 85.     | 81.           | 85.     |
|        |                                       | 00        | 50      | 00        | 00      | 50      | 00      | 00         | 00      | 00      | 50      | 50      | 50      | 50    | 00   | 00      | 00   | 00          | 50      | 50      | 50      | 00      | 50      | 50      | 50      | 00            | 00      |
| 3      | Full blooming<br>Beginning of         | 99.       | 102     | 100       | 103     | 94.     | 99.     | 97.        | 101     | 101     | 104     | 100     | 104     | 101   | 103  | 101     | 104  | 95.         | 97.     | 101     | 104     | 95.     | 99.     | 98.     | 102     | 94.           | 97.     |
|        |                                       | 50        | .00     | .00       | .50     | 50      | 00      | 00         | .50     | .00     | .00     | .50     | .00     | .00   | .50  | .00     | .00  | 00          | 00      | .50     | .00     | 00      | 00      | 50      | .50     | 00            | 00      |
| 4      | harvest<br>Cluster weight             | 167       | 172     | 173       | 178     | 160     | 165     | 176        | 179     | 182     | 187     | 172     | 175     | 169   | 173  | 170     | 174  | 175         | 179     | 175     | 179     | 172     | 177     | 170     | 173     | 172           | 175     |
|        |                                       | .50       | .00     | .50       | .00     | .00     | .00     | .50        | .00     | .00     | .50     | .00     | .00     | .00   | .50  | .00     | .00  | .00         | .00     | .00     | .00     | .00     | .50     | .00     | .50     | .00           | .50     |
| 5      | (g)                                   | 9.6       | 7.4     | 7.3       | 5.4     | 12.     | 8.8     | 7.2        | 5.8     | 7.1     | 5.8     | 9.3     | 7.8     | 7.9   | 6.6  | 10.     | 7.8  | 9.1         | 7.3     | 7.0     | 5.9     | 11.     | 8.6     | 7.3     | 6.0     | 9.0           | 7.3     |
|        |                                       | 5         | 5       | 5         | 0       | 35      | 0       | 5          | 0       | 0       | 0       | 0       | 0       | 0     | 0    | 30      | 0    | 0           | 0       | 0       | 80      | 0       | 0       | 5       | 5       | 5             | 5       |
| 6      | Cluster length<br>Number of           | 5.7       | 5.4     | 5.3       | 4.9     | 5.5     | 4.4     | 7.0        | 6.6     | 6.3     | 5.7     | 6.4     | 5.9     | 5.7   | 5.9  | 6.2     | 5.6  | 7.7         | 6.6     | 5.3     | 5.3     | 8.5     | 7.7     | 6.2     | 5.7     | 8.5           | 7.5     |
|        |                                       | 0         | 5       | 5         | 0       | 0       | 5       | 0          | 0       | 5       | 0       | 5       | 5       | 0     | 5    | 5       | 0    | 0           | 5       | 5       | 0       | 0       | 0       | 0       | 5       | 0             | 0       |
| 7      | flowers per<br>cluster<br>Number of   | 8.3       | 6.8     | 7.2       | 6.5     | 8.7     | 8.0     | 8.2        | 7.4     | 9.4     | 8.3     | 8.9     | 8.2     | 11.   | 9.3  | 10.     | 8.8  | 10.         | 8.6     | 6.9     | 6.6     | 13.     | 11.     | 9.6     | 8.4     | 10.           | 9.6     |
|        |                                       | 0         | 5       | 5         | 5       | 5       | 5       | 0          | 5       | 5       | 0       | 5       | 0       | 40    | 0    | 20      | 5    | 00          | 5       | 0       | 0       | 85      | 15      | 0       | 5       | 75            | 0       |
| 8      | berries per<br>cluster                | 6.4       | 5.5     | 4.7       | 4.4     | 6.4     | 5.9     | 7.1        | 6.3     | 7.1     | 6.9     | 6.4     | 6.0     | 7.3   | 6.0  | 8.8     | 7.7  | 7.8         | 6.6     | 5.9     | 5.9     | 9.4     | 8.3     | 6.8     | 6.0     | 8.6           | 7.4     |
|        |                                       | 5         | 0       | 5         | 5       | 5       | 0       | 5          | 5       | 5       | 5       | 0       | 5       | 0     | 5    | 0       | 5    | 0           | 5       | 5       | 5       | 5       | 0       | 5       | 5       | 0             | 0       |
| 9      | Fruit set                             | 78.       | 80.     | 65.       | 67.     | 76.     | 75.     | 87.        | 85.     | 76.     | 83.     | 71.     | 73.     | 64.   | 65.  | 86.     | 86.  | 79.         | 77.     | 85.     | 88.     | 68.     | 74.     | 71.     | 73.     | 80.           | 76.     |
|        |                                       | 95        | 05      | 35        | 85      | 70      | 30      | 00         | 10      | 95      | 55      | 40      | 80      | 40    | 15   | 30      | 70   | 10          | 95      | 65      | 75      | 60      | 45      | 60      | 60      | 20            | 50      |
| 1      | Berry weight (g)                      | 1.6       | 1.2     | 1.6       | 1.2     | 2.0     | 1.4     | 1.0        | 0.9     | 1.0     | 0.8     | 1.5     | 1.2     | 1.0   | 1.0  | 1.1     | 1.0  | 1.2         | 1.1     | 1.2     | 1.0     | 1.1     | 1.0     | 1.1     | 0.9     | 1.1           | 0.9     |
| 0      |                                       | 0         | 5       | 5         | 0       | 5       | 5       | 5          | 0       | 5       | 0       | 0       | 0       | 5     | 5    | 5       | 0    | 0           | 0       | 5       | 0       | 5       | 5       | 5       | 5       | 0             | 5       |
| 1      | Berry diameter<br>(mm)                | 14.       | 12.     | 14.       | 12.     | 15.     | 14.     | 12.        | 10.     | 12.     | 11.     | 13.     | 13.     | 12.   | 11.  | 12.     | 11.  | 12.         | 11.     | 12.     | 11.     | 12.     | 11.     | 12.     | 10.     | 12.           | 11.     |
| 1      |                                       | 00        | 60      | 00        | 95      | 45      | 80      | 05         | 85      | 05      | 05      | 75      | 30      | 55    | 20   | 75      | 95   | 60          | 85      | 70      | 60      | 30      | 90      | 55      | 90      | 55            | 80      |
| 1      | Length of shoot<br>(cm)               | 64.       | 94.     | 78.       | 114     | 72.     | 110     | 107        | 146     | 79.     | 125     | 66.     | 114     | 96.   | 146  | 81.     | 135  | 98.         | 153     | 69.     | 110     | 101     | 130     | 58.     | 119     | 80.           | 126     |
| 2      |                                       | 40        | 80      | 50        | .75     | 15      | .40     | .15        | .25     | 50      | .95     | 65      | .45     | 20    | .20  | 00      | .95  | 60          | .15     | 10      | .40     | .95     | .25     | 35      | .55     | 65            | .70     |
| 1      | Number of<br>clusters per shoot       | 19.       | 62.     | 17.       | 66.     | 16.     | 53.     | 22.        | 53.     | 16.     | 53.     | 21.     | 47.     | 16.   | 53.  | 16.     | 57.  | 32.         | 65.     | 8.6     | 26.     | 30.     | 54.     | 17.     | 47.     | 20.           | 58.     |
| 3      |                                       | 45        | 95      | 00        | 20      | 30      | 35      | 90         | 70      | 00      | 80      | 15      | 75      | 25    | 40   | 20      | 10   | 20          | 40      | 5       | 50      | 00      | 60      | 15      | 45      | 10            | 30      |
| 1      | Yield per shoot<br>(kg)               | 188       | 504     | 125       | 403     | 200     | 469     | 165        | 311     | 112     | 312     | 194     | 370     | 128   | 358  | 167     | 445  | 288         | 473     | 61.     | 156     | 350     | 469     | 125     | 286     | 183           | 429     |
| 4      |                                       | .65       | .45     | .90       | .80     | .45     | .55     | .90        | .00     | .35     | .05     | .05     | .95     | .30   | .05  | .60     | .70  | .45         | .50     | 40      | .35     | .40     | .65     | .00     | .10     | .15           | .85     |
| 1      | % of shoot yield<br>in total yield    | 27.       | 72.     | 23.       | 76.     | 29.     | 70.     | 34.        | 65.     | 26.     | 74.     | 34.     | 65.     | 27.   | 72.  | 28.     | 71.  | 38.         | 61.     | 27.     | 72.     | 42.     | 57.     | 29.     | 70.     | 30.           | 69.     |
| 5      |                                       | 20        | 80      | 60        | 40      | 95      | 05      | 75         | 25      | 00      | 00      | 15      | 85      | 30    | 70   | 30      | 70   | 35          | 65      | 90      | 10      | 60      | 40      | 95      | 05      | 35            | 65      |
| 1      |                                       | 212       | 177     | 189       | 169     | 172     | 154     | 221        | 194     | 250     | 229     | 160     | 148     | 157   | 138  | 151     | 138  | 205         | 182     | 166     | 139     | 189     | 162     | 171     | 152     | 211           | 193     |
| 6      |                                       | .30       | .80     | .60       | .30     | .30     | .25     | .95        | .95     | .30     | .75     | .60     | .45     | .25   | .75  | .25     | .25  | .30         | .25     | .25     | .80     | .10     | .35     | .30     | .05     | .90           | .85     |
| 1      | total antoc<br>aglicones              | 609       | 517     | 662       | 466     | 569     | 485     | 679        | 475     | 963     | 682     | 439     | 328     | 607   | 529  | 539     | 492  | 626         | 460     | 523     | 472     | 602     | 430     | 551     | 520     | 553           | 485     |
| 7      |                                       | .70       | .90     | .55       | .70     | .05     | .80     | .55        | .15     | .30     | .00     | .50     | .85     | .45   | .20  | .45     | .90  | .95         | .25     | .55     | .70     | .35     | .65     | .95     | .30     | .45           | .10     |
| 1      |                                       | 254       | 200     | 250       | 203     | 243     | 189     | 260        | 198     | 382     | 272     | 218     | 158     | 253   | 198  | 218     | 197  | 240         | 179     | 218     | 191     | 240     | 151     | 218     | 191     | 262           | 223     |
| 8      |                                       | .70       | .30     | .80       | .60     | .50     | .10     | .15        | .40     | .25     | .20     | .05     | .00     | .10   | .70  | .60     | .25  | .95         | .20     | .60     | .95     | .95     | .90     | .60     | .95     | .70           | .20     |
| 1      | del 3 glu                             | 115       | 85.     | 112       | 98.     | 104     | 78.     | 136        | 91.     | 196     | 103     | 45.     | 26.     | 113   | 87.  | 99.     | 73.  | 136         | 106     | 93.     | 67.     | 124     | 93.     | 108     | 82.     | 88.           | 63.     |
| 9      |                                       | .25       | 50      | .30       | 15      | .05     | 05      | .90        | 15      | .20     | .75     | 50      | 10      | .65   | 65   | 15      | 15   | .90         | .15     | 85      | 85      | .60     | 85      | .05     | 05      | 75            | 75      |
| 2      |                                       | 221       | 218     | 255       | 134     | 210     | 207     | 234        | 164     | 317     | 241     | 152     | 127     | 220   | 222  | 205     | 207  | 215         | 145     | 200     | 202     | 203     | 155     | 200     | 221     | 170           | 172     |
| 0      |                                       | .95       | .90     | .25       | .35     | .75     | .70     | .50        | .70     | .15     | .90     | .95     | .70     | .35   | .30  | .85     | .80  | .30         | .50     | .55     | .50     | .00     | .50     | .55     | .70     | .00           | .80     |
| 2      | cya 3 rut                             | 17.       | 13.     | 44.       | 30.     | 10.     | 10.     | 48.        | 20.     | 67.     | 64.     | 23.     | 17.     | 20.   | 20.  | 15.     | 14.  | 33.         | 29.     | 10.     | 33.     | 29.     | 24.     | 24.     | 32.     | 25.           |         |
| 1      |                                       | 80        | 20      | 20        | 60      | 75      | 95      | 00         | 90      | 70      | 15      | 00      | 05      | 35    | 55   | 85      | 70   | 80          | 40      | 55      | 40      | 80      | 40      | 75      | 60      | 00            | 35      |

|   |                  |     |     |     |     |     |     |     |     |     |     |     |     |     |     |     |     |     |     |     |     |     |     |     |     |     |     |
|---|------------------|-----|-----|-----|-----|-----|-----|-----|-----|-----|-----|-----|-----|-----|-----|-----|-----|-----|-----|-----|-----|-----|-----|-----|-----|-----|-----|
| 2 |                  | 3.5 | 4.2 | 3.6 | 4.1 | 4.1 | 4.4 | 2.8 | 3.1 | 3.2 | 3.5 | 4.4 | 4.8 | 3.8 | 4.2 | 5.0 | 5.6 | 3.7 | 4.1 | 5.0 | 5.3 | 3.3 | 3.6 | 2.6 | 2.7 | 3.5 | 3.8 |
| 2 | dpph             | 0   | 0   | 0   | 5   | 0   | 0   | 5   | 5   | 5   | 5   | 0   | 0   | 0   | 5   | 5   | 0   | 0   | 0   | 5   | 0   | 5   | 5   | 0   | 5   | 5   | 5   |
| 2 |                  | 2.0 | 1.8 | 2.2 | 1.9 | 1.2 | 1.1 | 1.3 | 1.2 | 1.5 | 1.0 | 1.7 | 1.2 | 1.1 | 1.0 | 1.1 | 0.8 | 1.4 | 1.3 | 1.0 | 0.8 | 1.2 | 1.2 | 1.0 | 0.9 | 0.9 | 0.8 |
| 3 | kempfer          | 0   | 5   | 0   | 0   | 0   | 0   | 0   | 0   | 5   | 0   | 5   | 0   | 5   | 0   | 0   | 0   | 5   | 0   | 5   | 5   | 0   | 5   | 5   | 5   | 5   | 5   |
| 2 |                  | 3.0 | 3.2 | 3.2 | 3.0 | 2.8 | 2.5 | 2.7 | 2.7 | 2.1 | 1.9 | 2.8 | 2.6 | 2.9 | 2.5 | 2.6 | 2.8 | 2.2 | 2.4 | 2.0 | 2.2 | 3.4 | 3.0 | 2.0 | 1.8 | 2.4 | 2.3 |
| 4 | myricetin        | 5   | 0   | 0   | 0   | 0   | 0   | 0   | 0   | 0   | 0   | 5   | 5   | 0   | 5   | 0   | 5   | 0   | 5   | 0   | 5   | 5   | 5   | 0   | 5   | 5   | 0   |
| 2 |                  | 7.1 | 6.2 | 7.3 | 5.8 | 7.3 | 6.5 | 5.4 | 5.1 | 8.3 | 7.2 | 8.1 | 7.0 | 5.8 | 5.5 | 4.1 | 3.8 | 7.3 | 7.0 | 6.4 | 5.3 | 8.2 | 7.6 | 5.2 | 5.3 | 7.2 | 7.2 |
| 5 | quercetin        | 5   | 5   | 0   | 5   | 0   | 0   | 0   | 5   | 0   | 0   | 0   | 0   | 0   | 0   | 5   | 5   | 5   | 5   | 0   | 0   | 5   | 5   | 0   | 5   | 0   | 0   |
| 2 |                  | 12. | 11. | 12. | 10. | 11. | 10. | 9.4 | 9.1 | 11. | 10. | 12. | 10. | 9.8 | 9.0 | 7.8 | 7.5 | 11. | 10. | 9.3 | 8.3 | 12. | 11. | 8.2 | 8.0 | 10. | 10. |
| 6 | total flavanoids | 20  | 25  | 70  | 75  | 25  | 10  | 0   | 0   | 95  | 10  | 65  | 80  | 5   | 5   | 5   | 0   | 00  | 80  | 5   | 5   | 90  | 95  | 5   | 5   | 50  | 35  |
| 2 | Total soluble    | 12. | 11. | 12. | 11. | 11. | 9.7 | 13. | 11. | 17. | 14. | 13. | 11. | 14. | 12. | 13. | 10. | 14. | 11. | 13. | 10. | 13. | 11. | 14. | 12. | 14. | 11. |
| 7 | solids (%)       | 40  | 10  | 65  | 10  | 10  | 5   | 60  | 60  | 25  | 45  | 55  | 35  | 85  | 10  | 30  | 40  | 35  | 45  | 40  | 75  | 55  | 00  | 20  | 70  | 25  | 75  |
| 2 |                  | 2.2 | 2.2 | 2.3 | 2.3 | 1.7 | 1.8 | 1.6 | 1.6 | 2.4 | 2.4 | 1.8 | 1.9 | 1.7 | 1.6 | 1.3 | 1.4 | 1.8 | 2.0 | 2.1 | 2.1 | 1.8 | 1.8 | 1.8 | 2.0 | 1.8 | 2.0 |
| 8 | Total Acids (%)  | 5   | 0   | 0   | 0   | 5   | 0   | 0   | 5   | 0   | 0   | 5   | 0   | 0   | 5   | 5   | 0   | 5   | 5   | 0   | 0   | 5   | 0   | 0   | 0   | 0   | 0   |
| 2 |                  | 8.8 | 8.0 | 9.0 | 7.1 | 8.7 | 7.0 | 8.3 | 7.7 | 13. | 10. | 9.4 | 8.3 | 10. | 9.4 | 9.2 | 8.0 | 10. | 8.7 | 9.0 | 7.4 | 9.4 | 7.6 | 10. | 9.7 | 11. | 8.1 |
| 9 | Total sugars (%) | 0   | 5   | 5   | 0   | 5   | 5   | 5   | 0   | 40  | 25  | 0   | 5   | 30  | 0   | 0   | 5   | 20  | 0   | 0   | 0   | 5   | 5   | 65  | 5   | 85  | 5   |
| 3 |                  | 3.9 | 3.6 | 3.9 | 3.2 | 5.8 | 4.6 | 5.2 | 4.7 | 6.0 | 4.8 | 5.0 | 4.5 | 6.1 | 6.0 | 6.9 | 5.7 | 5.7 | 4.3 | 4.4 | 3.9 | 5.3 | 4.4 | 6.1 | 5.4 | 7.4 | 4.6 |
| 0 | Sweetness        | 0   | 5   | 0   | 0   | 0   | 0   | 0   | 5   | 5   | 0   | 0   | 0   | 0   | 5   | 5   | 0   | 0   | 0   | 0   | 0   | 5   | 5   | 0   | 5   | 0   | 0   |
| 3 | Ascorbic acid    | 125 | 134 | 149 | 113 | 130 | 113 | 142 | 136 | 137 | 123 | 132 | 126 | 135 | 119 | 133 | 123 | 149 | 153 | 115 | 100 | 158 | 123 | 140 | 113 | 152 | 153 |
| 1 | (mg/100 g)       | .00 | .30 | .55 | .20 | .45 | .80 | .00 | .95 | .90 | .95 | .90 | .80 | .00 | .05 | .35 | .90 | .00 | .40 | .75 | .80 | .40 | .90 | .90 | .60 | .75 | .30 |

‡ Abbreviations correspond to the score plots in PCA analysis (Fig 2A).

† Abbreviations correspond to the factor loadings in PCA analysis (Fig 2B).
